# A new High-Throughput-Screening-assay for Photoantimicrobials Based on EUCAST Revealed Photoantimicrobials in Cortinariaceae

1 **Johannes Fiala<sup>1,2, †</sup>, Harald Schöbel<sup>3, †</sup>, Pamela Vrabl<sup>2</sup>, Dorothea Dietrich<sup>2</sup>, Fabian Hammerle<sup>1</sup>,**  
2 **Desirée Josefine Altmann<sup>2</sup>, Ronald Stärz<sup>3</sup>, Ursula Peintner<sup>2</sup>, and Bianka Siewert<sup>1\*</sup>**

3 <sup>1</sup> Department of Pharmacognosy, Institute of Pharmacy, University of Innsbruck, Innsbruck, Austria

4 <sup>2</sup> Institute of Microbiology, University of Innsbruck, Innsbruck, Austria

5 <sup>3</sup> Department of Biotechnology, MCI Management Center Innsbruck, Maximilianstraße 2, Innsbruck,  
6 6020 Austria

7 <sup>†</sup>These authors contributed equally.

8 \* **Correspondence:**

9 [Bianka.siewert@uibk.ac.at](mailto:Bianka.siewert@uibk.ac.at)

10 **Keywords:** Photoantimicrobials, PACT, EUCAST, Cortinariaceae, Anthraquinone, LED-technique

## 11 **Abstract**

12 A spark of light might unravel antimicrobial activity of colored compounds, which otherwise would  
13 have been classified as inactive. While many mushrooms contain such colorful pigments but lack  
14 antimicrobial activity, we wondered if a controlled irradiation is needed to unleash their effect. To  
15 explore such photoantimicrobial actions in the Kingdom Fungi, an efficient high-throughput-screening  
16 (HTS) assay is needed. Here we report on the establishment of a reliable photoantimicrobial assay  
17 based on the EUCAST recommendations, which was validated with known photosensitizers (i.e.,  
18 curcumin, phenalenone, rose bengal, an hypericum extract, and methylene blue). Furthermore, an  
19 improved LED-irradiation setup enabling with only 24 LEDs a homogenous irradiation of a 96-well  
20 plate is presented. The established HTS-assay was utilized to screen six colorful *Cortinarius* extracts  
21 unrevealing *C. xanthophyllus* and *C. rufo-olivaceus* as promising sources for new photoantimicrobials.

## 22 **1 Introduction**

23 Whenever microorganisms share the same ecological niche – as for example soil fungi and soil bacteria  
24 – an orchestra of chemical compounds evolves reaching from mediators of stimulative symbiosis to  
25 detrimental antibiosis (Frey-Klett et al., 2011; Deveau et al., 2018). Plenty of such natural products  
26 have commercial values, especially as pharmaceuticals (Hyde et al., 2019). For example, most  
27 antibiotics approved by the Food and Drug Administration (FDA) are natural products (Lewis, 2020)  
28 and belong to antibiosis, which is described as chemical warfare.

29 According to Künzler (2018), fungal cells usually defend themselves by rather secreting chemical  
30 effectors against microbial competitors, than by storing them intracellular (Künzler, 2018).  
31 Nevertheless, fruiting bodies – or more precisely the hyphae differentiating into fruit-body tissues –  
32 often contain promising antibiotics. For example, various antimicrobial triterpenoids were isolated  
33 from the fruiting bodies of polypores, especially of *Ganoderma spp.* (Dresch et al., 2015; Basnet et al.,  
34 2017). These observations are rather the rule than the exception, because for most basidiomycete

## A new High-Throughput-Screening-assay for Photoantimicrobials

35 genera an antimicrobial activity was found in extracts from the fruiting bodies. Just for a few genera,  
36 for example *Cortinarius*, antimicrobial activities were infrequently described. This, however, contrasts  
37 with the observation that fruiting bodies of this genus are rarely infested by other microorganisms  
38 (Moser, 1972). Thus, we were wondering whether an important co-factor was missing in the common  
39 screening attempts.

40 Co-factors, which can influence the antimicrobial activity of a secondary metabolite, might be metals  
41 (Lachowicz et al., 2020), pH-conditions (Lee et al., 1997; Wiegand et al., 2015), or just a spark of light  
42 (Wozniak and Grinholc, 2018; Dos Santos et al., 2019). Such light-activated defense strategies  
43 (Downum, 1992; Flors and Nonell, 2006) are well-known for members of the kingdom Plantae and  
44 were recently suggested to be also present in fungi (Siewert and Stuppner, 2019; Siewert et al., 2019;  
45 Siewert, 2021). Furthermore, light-activated natural compounds are promising pharmaceuticals  
46 (Hudson and Towers, 1991; Berenbaum, 1995; Siewert and Stuppner, 2019).

47 As part of a putative light-activated defense system, the first photosensitizers, i.e. light-activated  
48 chemical compounds, were recently activity-guided discovered in fruiting bodies of macromycota  
49 (Siewert et al., 2019; Hammerle et al., 2020). Light-activated antimicrobial effects of basidiomycetes  
50 are, however, not described yet, despite promising hints (Siewert, 2021). The lack of described  
51 photoantimicrobials might be the consequence of a non-existing photo-antimicrobial high-throughput  
52 screening (HTS) assay.

53 In general, plenty of different antimicrobial susceptibility tests are available determining the minimal  
54 inhibitory activity (MIC) of a substance. The utilized techniques reach from diffusion over thin-layer  
55 chromatography to dilution methods (Balouiri et al., 2016). In recent years, two standard protocols –  
56 one published by the Clinical and Laboratory Standards Institute (Weinstein and Lewis, 2020) and the  
57 other by the European Committee on Antimicrobial Susceptibility Testing (EUCAST (Microbiology  
58 and Diseases, 2003)) – were established. Most promising for a HTS assays are such microbroth-dilution  
59 assays, which are based on visual (CLSI) or spectrophotometric (EUCAST) turbidity measurements  
60 (Wiegand et al., 2008). Microbroth-dilution assays can be conducted in 96 well-plates and thus allow  
61 a high throughput: Eight antibiotics can be tested in ten different concentrations on one plate in the  
62 dark, including the sterility and growth controls (Wiegand et al., 2008).

63 The crucial part of every PhotoMIC assay is the irradiation. Nowadays, dental curing lights (Nielsen  
64 et al., 2015) or handmade LED setups (Morici et al., 2020) replaced previously used light bulbs and  
65 lasers (Calin and Parasca, 2009). Dental lights – originally designed to polymerize composite fillings  
66 – allow only single irradiation, and therefore limit the throughput. Described LED-setups (not limited  
67 to microbials) vary from a single-emitter LED (Ogonowska et al., 2019) over 24 (Quintanar et al.,  
68 2016) and 96 LEDs (Butler et al., 2010; Chen et al., 2012; Hopkins et al., 2016; Katz et al., 2018) to  
69 195 (Bajgar et al., 2020) or even 432 diodes (Pieslinger et al., 2006). A drawback of all settings with  
70 less than 100 diodes, is the missing homogenous light-distribution throughout a 96-well plate (Chen et  
71 al., 2012; Hopkins et al., 2016; Quintanar et al., 2016; Ogonowska et al., 2019). Consequently, only  
72 parts of a 96-well plate can be used. Common to all multi-diodes settings is the equidistant arrangement  
73 of the diodes along the printed circuit board. Taking the nature of light into account, however, we  
74 wondered whether an asymmetric positioning of the diodes might improve the all-over distribution of  
75 light. Having extrapolated simulations for single LEDs in mind, we hypothesized that a homogenous  
76 illumination with only 24 diodes is possible.

77 Here we will report on (1) the design of a modular, 24 LEDs based irradiation setup for 96-well plates,  
78 (2) the establishment of a HTS-PhotoMic assay which was validated with five standard

## A new High-Throughput-Screening-assay for Photoantimicrobials

79 photosensitizers (PS, curcumin, phenalenone, rose bengal, and hypericin) and five irradiation  
80 wavelengths ( $\lambda = 428, 478, 523, 598, \text{ and } 640 \text{ nm}$ ); And, (3) the results of a sample set existing out of  
81 six *Cortinarius* extracts and identifying the basidiomycete *Cortinarius xanthophyllus* and *C. rufo-*  
82 *olivaceus* as species containing photoantimicrobial(s) active against *Staphylococcus aureus* and  
83 *Candida albicans*.

## 84 2 Materials and Methods

### 85 2.1 Optical simulations, irradiation setup, and light measurements

86 The irradiation system is based on LED-technology. To achieve uniform irradiance along the entire  
87 sample, the arrangement of the individual LEDs within the  $6 \times 4$  LED array is crucial. Therefore, the  
88 LED positions were optimized and verified with optical simulations. The simulation is based on an  
89 optical model for single LEDs (Wood, 1994) and is modified to calculate irradiance distribution in  
90 terms of Cartesian coordinates (Moreno et al., 2006). To simulate the irradiance  $E(x, y, z)$  at any point  
91 of the  $x, y$ -plane at a working distance  $z$ , the  $6 \times 4$  LED array is modeled as

$$92 \quad E(x, y, z) = \sum_{n=1}^6 \sum_{m=1}^4 \frac{z^k \cdot I_0}{[(x - x_n)^2 + (y - y_m)^2 + z^2]^{\frac{k+2}{2}}}$$

93 where  $x_n$  and  $y_m$  are the positions of the individual LEDs in meters and  $I_0$  is the radiant intensity in  
94 watt per steradian. The deviation of the manufactured LED from a perfect Lambertian emitter is  
95 considered with the correction factor  $k$ , which depends on the viewing angle  $\theta_{1/2}$

$$96 \quad k = -\frac{\ln 2}{\ln \cos \theta_{1/2}}$$

97 The viewing angle  $\theta_{1/2}$  is the off-axis angle from the LED centerline where the radiant intensity is half  
98 of the peak value and is provided by the LED manufacturer. By varying the individual LED positions  
99  $x_m$  and  $y_m$ , the irradiance distribution in the sample plane can be modified. To achieve a uniform  
100 irradiance distribution, the individual LED positions were optimized by a nonlinear least-square curve  
101 fitting method with constraints (Betts, 1976; Coleman and Li, 1994; 1996). Optical simulations and  
102 optimization were performed using MATLAB R2019b.

103 All irradiation experiments were carried out with a specially developed irradiation device (SciLED,  
104 MCI, Innsbruck) based on LED technology (Figure 1, left). The device consists of an extendable  
105 sample holder, where the 96-well plates can be inserted and reproducibly positioned in the irradiated  
106 area. If the experimental design requires alternative culture plates, e. g. petri dishes, the sample holder  
107 can be easily adapted. To ensure a versatile area of application, the device has a modular design.  
108 Depending on the demanded irradiation conditions, the LED modular units (Figure 1, insert) can be  
109 exchanged. The LED modules were assembled with Luxeon CZ Color Line LEDs (B.V., 2019). Each  
110 module consists of 24 LEDs of the same color (nominal peak wavelength). For this work, LEDs of the  
111 color violet ( $\lambda = 420\text{--}430 \text{ nm}$ ), blue ( $\lambda = 465\text{--}475 \text{ nm}$ ), green ( $\lambda = 520\text{--}540 \text{ nm}$ ), amber ( $\lambda = 585\text{--}$   
112  $600 \text{ nm}$ ), and red ( $\lambda = 624\text{--}634 \text{ nm}$ ) were used. The arrangement of the LEDs in the array was  
113 optimized to ensure a uniform irradiance. Figure 1 (right) shows the simulation of the irradiance of one  
114 LED modular unit. Next to the wavelength, the radiant exposure can be adjusted by a timer and an  
115 intensity controller.

## A new High-Throughput-Screening-assay for Photoantimicrobials

116 Light measurements were conducted to characterize the illumination device. To check the uniformity,  
117 irradiance was measured using a radiometer and a chemical actinometer (i.e., ferrioxalate). Irradiance  
118 measurements were carried out along a 17 mm x 17 mm grid using the radiometer PM100D and the  
119 photodiode power sensor S120 VC with a measurement uncertainty of  $\pm 3\%$  ( $\lambda = 440 - 980$  nm) and  
120  $\pm 5\%$  ( $\lambda = 280 - 439$  nm) (Thorlabs). The ferrioxalate actinometer ( $K_3[Fe(C_2O_3)_3]$ ) and  
121 phenanthroline-based developing solutions were made using previously published methods (Hopkins  
122 et al., 2016). Spectral measurements were performed using the spectrometer MAYA 2000 Pro equipped  
123 with diffraction grating #HC-1 and entrance slit of 5  $\mu\text{m}$  (Ocean Insights), resulting in a spectral  
124 resolution of 0.66 nm FWHM. Light was coupled into the spectrometer via an optical fiber with a core  
125 diameter of 600  $\mu\text{m}$  (QP600-1-SR-BX, Ocean Insights) and a cosine corrector (CC-3-UV-S, Ocean  
126 Insights). The spectrometer was calibrated with a wavelength calibration source (mercury-argon HG-  
127 2, Ocean Insights). To characterize the spectral power distribution, the peak shape was modeled with  
128 a sum of Gaussian functions (Reifegerste and Lienig, 2008; Supronowicz and Fryc, 2019). By fitting  
129 the sum of Gaussian functions to the spectral data, the wavelength where the intensity maximum occurs  
130 (peak wavelength in nm), the full width at half of the intensity maximum (FWHM in nm), and the full  
131 width at ten percent of the intensity maximum (FW 0.1  $\cdot I_{max}$  in nm) were calculated.

132 To evaluate the uniformity, the arithmetic mean irradiance  $E_m$ , the standard deviation  $SD$  and the  
133 coefficient of variation  $cv$  were calculated. As the uniformity was simulated and measured using a  
134 radiometer and a chemical actinometer, a comparison with the dimensionless parameter  $cv$  is  
135 convincing. The coefficient of variation is calculated as the ratio of the standard deviation and the  
136 arithmetic mean. Ensuring a precise representation of the spectral data by the model with Gaussian  
137 functions, the fit was accepted with a coefficient of determination  $R^2$  larger than 0.999.

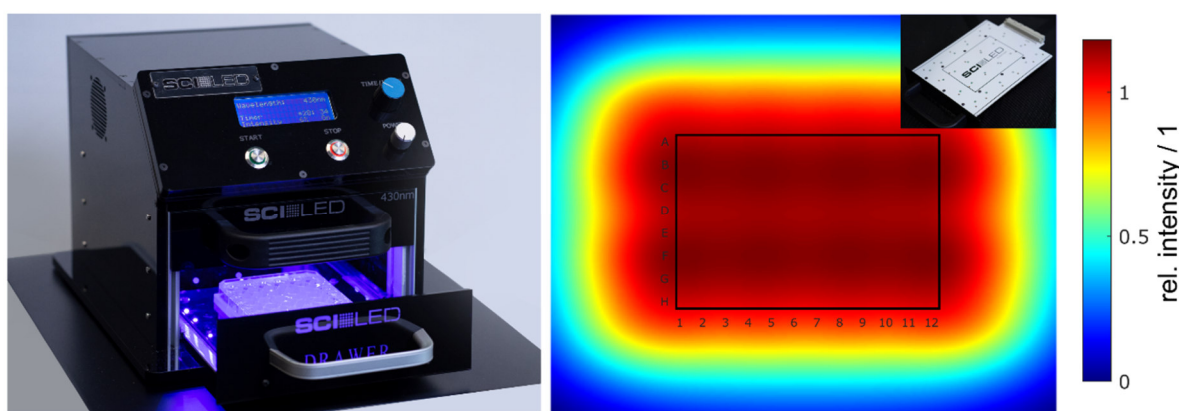

Figure 1: (Color online) Irradiation Setup (SciLED) and simulated irradiance. The irradiation experiments were performed with a LED-based setup (left). Due to its design, the LED modules can be easily exchanged to enable different wavelength settings (insert, top right). With the integrated user interface, the radiant exposure can be set by a timer and an intensity controller. The arrangement of the  $6 \times 4$  LED array on the modules was optimized to achieve a uniform irradiance at the sample plane. Optical simulations of the irradiance show a uniform distribution with a theoretical variation of less than 0.1% over the entire area of a 96-well plates (right).

138

## A new High-Throughput-Screening-assay for Photoantimicrobials

### 139 **2.2 Mycochemical Part – Reagents, Instruments, and Methods**

140 All solvents for the extraction and isolation processes were purchased from VWR International  
141 (Vienna, Austria). Acetone was distilled prior to use. Solvents for HPLC experiments had pro analysis  
142 (p.a.) quality and were obtained from Merck (Merck KGaA, Darmstadt, Germany). Ultrapure water  
143 was obtained with the Sartorius arium® 611 UV purification system (Sartorius AG, Göttingen,  
144 Germany).

145 Desiccation of the collected fungi was achieved with a dörrex® drying-apparatus from Stöckli (A. &  
146 J. Stöckli AG, Switzerland) operated at a temperature of 50 °C. The fungal biomaterial was milled with  
147 a Bosch rotating coffee grinder MKM 6003 (Stuttgart, Germany). The samples were weight with scales  
148 from KERN ALS 220-4 (KERN & SOHN GmbH, Balingen-Frommern, Germany) and Sartorius  
149 Cubis®-series (Sartorius AG, Göttingen, Germany). During the extraction process, the ultrasonic  
150 bathes Sonorex RK 106, Sonorex RK 52, and Sonorex TK 52 (BANDELIN electronic GmbH & Co.  
151 KG, Berlin, Germany) were utilized. Vortexing was done with a Vortex-Genie 2 mixer (Scientific  
152 Industries, Inc., Bohemia, New York). For centrifugation, an Eppendorf 5804R centrifuge with a F-  
153 45-30-11 - 30 place fixed angle rotor (Hamburg, Germany) was used.

154 HPLC measurements were carried out with the modular system Agilent Technologies 1260 Infinity II  
155 with a quaternary pump, vial sampler, column thermostat, diode-array detector, and mass spectrometer.  
156 Moreover, the HPLC-system Agilent Technologies 1200 Series with a binary pump, autosampler,  
157 column thermostat, and diode-array detector was used. HPLC-systems were purchased from Agilent  
158 Technologies, Inc. (Santa Clara, USA). For all HPLC measurements, a Synergi 4u MAX-RP 80A 150  
159 x 4,60mm column was used. HPLC-DAD-ESI-MS analysis was carried out with the modular system  
160 Agilent Technologies 1260 Infinity II equipped with a quaternary pump, vial sampler, column  
161 thermostat, diode-array detector, and an ion trap mass spectrometer (amaZon, Bruker, Bremen,  
162 Germany).

163 Pipetting was done with pipettes and tips from Eppendorf AG (Hamburg, Germany) and STARLAB  
164 International GmbH (Hamburg, Germany). Reagent reservoirs were obtained from Thermo Fischer  
165 Scientific (Waltham, Massachusetts, USA).

### 166 **2.3 Mycochemical Part**

#### 167 **2.3.1 Preparation of fungal extracts**

168 The fungal biomaterial was dried on a desiccator ( $T \sim 50^{\circ}\text{C}$ ) right after collection (see Table S1) and  
169 stored at room temperature until further use ( $T = 23.0^{\circ}\text{C}$ , humidity = 20 +/- 5%). The biomaterials were  
170 milled and sieved utilizing a mesh with the size of 400  $\mu\text{m}$ . The extraction process was performed  
171 under light exclusion at room temperature. The powdered materials ( $m = 2.00\text{ g}$ ) were extracted with  
172 acidified acetone ( $V = 20\text{ ml}$ , 0.1 v/v% 2N HCl) in an ultrasonic bath ( $t = 10\text{ min}$ ). After centrifugation  
173 ( $t = 10\text{ min}$ ,  $T = 4^{\circ}\text{C}$ ,  $F = 20817\text{ g}$ ), acetone was decanted and filtered through cotton wool. The fungal  
174 material was extracted twice more with acidified acetone ( $V = 5\text{ ml}$ ). After centrifugation, the  
175 supernatant was collected, evaporated, and stored in brown glass vials at room temperature (see Table  
176 1 for yields).

#### 177 **2.3.2 Reagents, Instruments, and Methods**

178 Curcumin, dimethylsulfoxid (DMSO), lysogeny broth (LB) agar, phenalenone, and RPMI1640  
179 medium were received from Merck KGaA (Darmstadt, Germany). Potato dextrose agar (PDA) and  
180 Mueller Hinton Broth (MHB) were purchased from VWR International (Vienna, Austria). Rose Bengal

## A new High-Throughput-Screening-assay for Photoantimicrobials

181 (RB) was received from TCI Europe (Zwijndrecht, Belgium). *Hypericum perforatum* extract (ethanol)  
182 was prepared from the pharmaceutical drug “Johanniskraut 600 mg forte” by Apomedica (Graz,  
183 Austria). The 96-well plates (flat bottom) were bought from Sarstedt (Nümbrecht, Germany).

184 The U-2001 spectrophotometer for adjusting the McFarland standard was from Hitachi (Chiyoda,  
185 Japan). For measurement of the 96-well plates, a Tecan Sunrise Remote Plate Reader was used  
186 (Männedorf, Switzerland). The adjustment of pH-values was carried out with the pH-meter Mettler  
187 Toledo SevenMulti (Mettler-Toledo GmbH, Vienna, Austria).

188 Pipetting was done with pipettes and tips from Eppendorf AG (Hamburg, Germany) and STARLAB  
189 International GmbH (Hamburg, Germany). Reagent reservoirs were obtained from Thermo Fischer  
190 Scientific (Waltham, Massachusetts, USA).

### 191 2.3.3 Strains and Cultivation

192 All experiments on photodynamic inhibition (PDI) of growth of microorganisms (MOs) and the  
193 preparations were carried out under aseptic conditions in a laminar airflow cabinet at room temperature.  
194 The test strains used in this study were *Candida albicans* (501670), *Escherichia coli* (DSM1103), and  
195 *Staphylococcus aureus* (DSM1104). The strains were reactivated from frozen state and prepared  
196 according to manufacturer's recommendations (<https://www.dsmz.de/>). Until further use, bacterial  
197 cultures were stored in darkness at 4°C on lysogeny broth agar. *C. albicans* was cultivated on potato  
198 dextrose agar under the same conditions.

199 For the PDI experiments, the stored cultures were reactivated, and an overnight culture was incubated  
200 ( $T = 37^{\circ}\text{C}$ ,  $t = 24$  h, dark conditions). The bacterial culture inoculum was prepared using a  
201 spectrophotometer measurement at  $\lambda = 600$  nm. Turbidity was adjusted to a McFarland standard of 0.5  
202 to prepare a standard suspension of  $1.5 \times 10^8$  colony forming units (CFU)/ml. For yeast suspensions,  
203 turbidity was measured at  $\lambda = 530$  nm. Liquid media used for PDI experiments were MHB for bacteria  
204 and RPMI-1640 (double strength) for yeast.

### 205 2.3.4 PhotoMIC Assay

206 For the PDI experiments, flat-bottom 96-well plates were used. On each plate, an extract test section,  
207 growth control, fraction-blank, medium-blank, and sterility controls were set up (Figure 2). In the test  
208 section three concentrations of fungal extracts (i.e.,  $c = 25$   $\mu\text{g}/\text{mL}$ ,  $50$   $\mu\text{g}/\text{mL}$ , and  $75$   $\mu\text{g}/\text{mL}$ ), were  
209 tested. If needed, smaller or larger concentrations were tested as well. Further, positive controls (dark  
210 condition) were established for each experiment: Curcumin ( $c = 30$   $\mu\text{g}/\text{mL}$ ,  $81.5$   $\mu\text{M}$ ) for *C. albicans*,  
211 phenalenone ( $c = 75$   $\mu\text{g}/\text{mL}$ ,  $416.2$   $\mu\text{M}$ ) for *E. coli*, and phenalenone ( $c = 25$   $\mu\text{g}/\text{mL}$ ,  $138.7$   $\mu\text{M}$ ) for  
212 *S. aureus*.

213 Positive controls, fungal extracts (FE), and growth control were inoculated with an inoculum  
214 ( $V = 50$   $\mu\text{l}$ ) of the test strains within  $t = 30$  min after the turbidity adjustment. Two identical 96-well  
215 plates were prepared for both dark and light treatment. After ten or sixty minutes of preincubation time  
216 in darkness, one plate was irradiated with the SciLED panel at  $\lambda = 470$  nm for  $t = 19$  min 8 sec,  
217 corresponding to a light dose of  $H = 9.3$   $\text{J}/\text{cm}^2$ . An alternative irradiation setup was  $t = 61$  min 44 sec,  
218 corresponding to a light dose of  $H = 30$   $\text{J}/\text{cm}^2$ . The other plate was kept in the darkness at room  
219 temperature.

## A new High-Throughput-Screening-assay for Photoantimicrobials

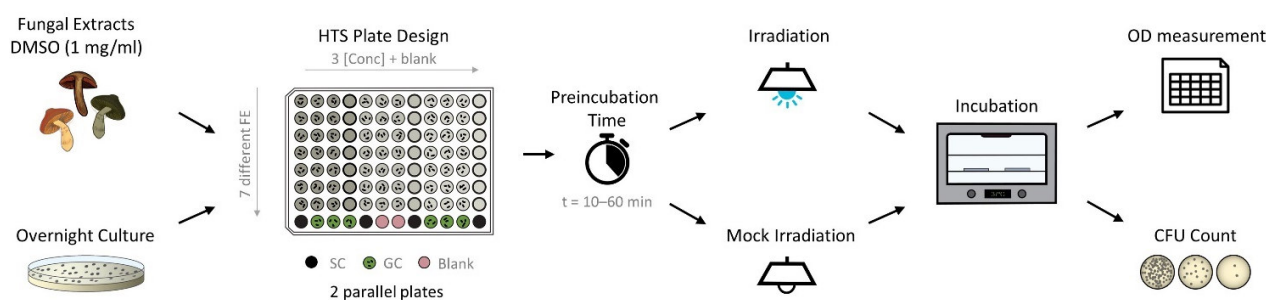

220

221 Figure 2. Flow chart of photo-antimicrobial HTS based on the microdilution method. The pipetting scheme represents the  
222 fast screening approach of extracts. Up to seven different fungal extracts with three concentrations each are tested on one  
223 plate. SC... sterility control, GC... growth control

224 After (mock)irradiation, the plates were submitted to turbidity measurements. Here, a plate reader was  
225 used and before measuring the optical density (bacteria:  $\lambda = 600$  nm, fungi:  $\lambda = 530$  nm), the plates  
226 were shaken for five seconds. Viability controls were drawn from the control vials and plated on  
227 LB/PDA agar. Afterwards, the 96-well plates and LB/PDA agar plates were incubated at  $T = 37^{\circ}\text{C}$  in  
228 the dark for 24 hours. A second measurement of turbidity was done, followed by taking samples of  
229 wells that showed inhibition ( $>20\%$ ) of population growth control.

230 Assessment of the PDI experiment was done by correlating the treated well to the uninhibited growth  
231 control. Turbidity of fraction-blank and medium-blank was subtracted from corresponding wells to  
232 eliminate deviation caused by darkening or bleaching of media and extracts. Each concentration of  
233 fungal extracts, the positive control, and the growth control were measured at least in triplicates.

### 234 2.4 Singlet-Oxygen Detection via the DMA-Assay

235 To analyze the ability of the six fungal extracts (FE) to generate singlet oxygen after irradiation, the  
236 previously described dimethyl anthracene (DMA) assay and a previously characterized irradiation  
237 setup were employed (Siewert et al., 2019). As a first step, a DMA solution in ethanol ( $c = 1.4$  mM)  
238 (L1) and a L-ascorbic acid-solution in ultrapure water ( $c = 100$  mM,  $\text{pH} = 7.0-7.4$ ) (L2) were prepared.  
239 The fungal extracts were dissolved in DMSO ( $c = 1$  mg/mL, FE) and subsequently mixed with the  
240 stock solutions (L1 and L2) as well as pure ethanol (L3) to obtain four test-solutions ( $V = 10$   $\mu\text{L}$  FE +  
241  $190$   $\mu\text{L}$  test-solution): (1) a pure ethanolic solution of the FE to observe photochemical changes of the  
242 extract due to the irradiation, (2) a mix with DMA to detect singlet oxygen, (3) a mix with DMA and  
243 the antioxidant L-ascorbic acid to prove that singlet oxygen caused the oxidation of DMA, and (4) a  
244 control consisting of an ethanolic solution of the extract and L-ascorbic acid to control, that no  
245 undesired reaction occurs. DMSO ( $V = 10$   $\mu\text{L}$ ) was used as negative control, berberine ( $c = 1$  mg/mL,  
246  $2.97$  mM, DMSO,  $V = 10$   $\mu\text{L}$ ) and RB ( $c = 0.1$  mg/mL,  $0.10$  mM, DMSO,  $V = 10$   $\mu\text{L}$ ) were used as  
247 positive controls. Thereafter, optical densities at the wavelengths  $\lambda = 377$  nm,  $468$  nm, and  $519$  nm  
248 were measured with a plate reader ( $t = 0$  min), followed by four cycles of blue light ( $\lambda = 468$  nm,  $1.24$   
249  $\text{J cm}^{-2} \text{min}^{-1}$ , berberine = positive control) or of green light irradiation ( $\lambda = 519$  nm,  $0.92$   $\text{J cm}^{-2} \text{min}^{-1}$ ,  
250 rose bengal = positive control). All measurements were done as technical duplicates. The results of the  
251 DMA-assay were presented as the mean  $\pm$  standard error. Differences between the relative singlet  
252 oxygen formation values were statistically evaluated using one-way ANOVA followed by the  
253 Bonferroni post-test, and  $p < 0.05$  was considered to be significant.

254

## A new High-Throughput-Screening-assay for Photoantimicrobials

### 255 3 Results

#### 256 3.1 Uniform irradiance and irradiation conditions

257 The nonlinear optimization of the individual LED positions in the array resulted in a symmetric but not  
258 equidistant arrangement. The objective was to achieve a homogenous irradiation distribution with  
259 theoretical variations below five percent in an irradiated area of 120 mm × 90 mm ( $x \times y$ ), which  
260 approximately corresponds to the size of a 96-well plate. After several optimization steps, a calculated  
261 coefficient of variation  $cv = 0.08\%$  was achieved in the optical simulations. Such uniformity was  
262 obtained by decreasing the relative spacing between the outside LEDs and positioning them beyond  
263 the area of the irradiated sample. The individual positions of the 24 LEDs are shown in Figure 3.  
264 Experimental evaluation of the uniformity resulted in an actual variation between  $cv = 7\%$  and  $cv =$   
265  $8\%$  for the irradiance measurements and a variation of  $cv = 9\%$  for the chemical actinometer  
266 measurements. Over the entire area of a 96-well plate, the resulting irradiance distribution is  
267 homogeneous, and from the uniformity standpoint, all 96 wells can be used for irradiation tests. Results  
268 of the optimization and irradiance distribution within the 96-well plates are shown in Figure 3.

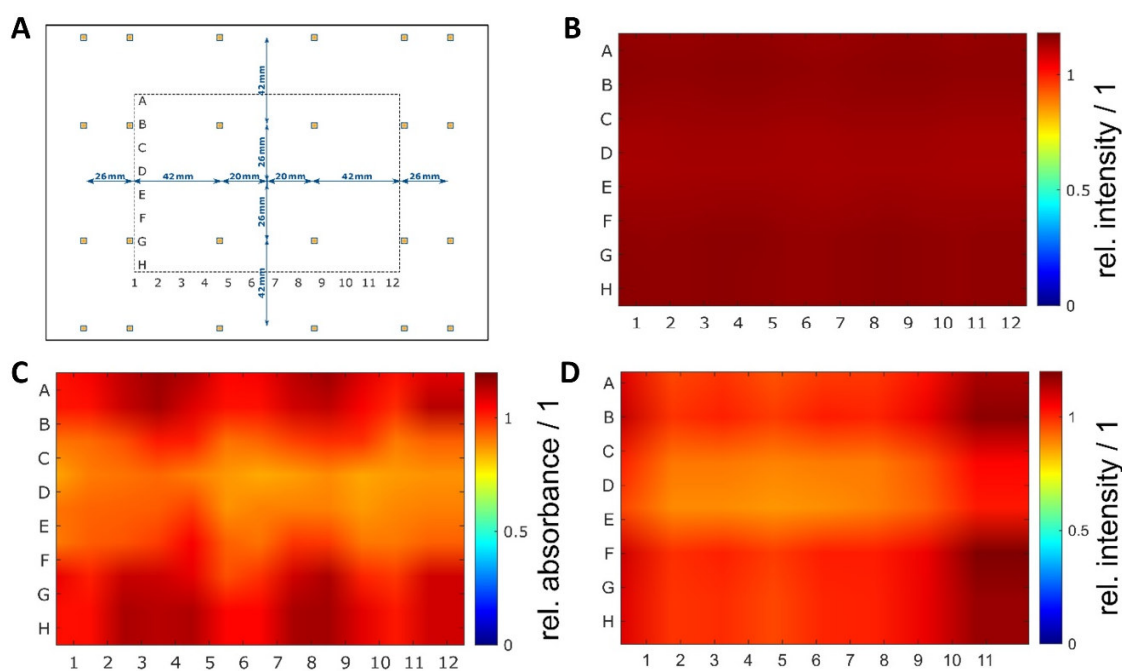

269

Figure 3: (Color online) Non-equidistant LED arrangement and results of homogeneity measurements. A nonlinear optimization of the individual LED positions in the  $xy$ -plane of the printed circuit board resulted in a symmetric but not equidistant arrangement with decreasing distances on the outside. For a better understanding of the LED arrangement, the position of the irradiated plate is illustrated as well (Figure 2a). The irradiance distribution at the sample plane was determined by optical simulations (Figure 2b) and measured with a chemical actinometer (Figure 2c) and a radiometer (Figure 2d). In the optical simulations a very high uniformity with a theoretical coefficient of variation less than 0.1% ( $cv_{sim} = 0.08\%$ ) were calculated. Experimental evaluation of the uniformity resulted in variations of less than 10% (chemical actinometer  $cv_{act} = 9\%$  and radiometer  $cv_{rad} = 8\%$ ).

270



## A new High-Throughput-Screening-assay for Photoantimicrobials

271 To fully characterize the irradiation device, the spectral power distribution and irradiance were  
272 measured for every LED module (violet, blue, green, amber, and red). From these measurements,  
273 several spectral parameters, including the actual peak wavelength and the full width at half maximum,  
274 were calculated and the average irradiance was determined. Spectral power distributions varied  
275 between 15 nm FWHM for violet LEDs and 33 nm FWHM for green LEDs. Average irradiance was  
276 the highest for the violet LED module with  $E_m = 13 \pm 1.0$  mW/cm<sup>2</sup> and the lowest for the amber LED  
277 module with  $E_m = 1.1 \pm 0.08$  mW/cm<sup>2</sup>. All results on the irradiation conditions are reported in Table  
278 1.

279 Table 1: Optical characterization of the irradiation device. The spectral power distributions and the irradiance at the sample  
280 plane were measured for all LED module colors. From the spectral data, the actual peak wavelength, the full width at half  
281 of the intensity maximum (FWHM), and the full width at ten percent of the intensity maximum (FW 0.1 ·  $I_{max}$ ) were  
282 obtained by fitting a sum of Gaussian functions to the data. From the irradiance measurements, the arithmetic mean ( $E_m$ ),  
283 the standard deviation ( $SD$ ) and the coefficient of variation ( $cv$ ) were calculated.

| LED module<br>color | spectral information |              |                            |              | irradiance                     |                               |             |
|---------------------|----------------------|--------------|----------------------------|--------------|--------------------------------|-------------------------------|-------------|
|                     | wavelength<br>[nm]   | FWHM<br>[nm] | FW 0,1 · $I_{max}$<br>[nm] | $R^2$<br>[1] | $E_m$<br>[mW/cm <sup>2</sup> ] | $SD$<br>[mW/cm <sup>2</sup> ] | $cv$<br>[1] |
| violet              | 428                  | 15           | 36                         | 0.9994       | 13                             | 1.0                           | 0.081       |
| blue                | 478                  | 27           | 63                         | 0.9991       | 8.7                            | 0.70                          | 0.076       |
| green               | 523                  | 33           | 78                         | 0.9998       | 6.0                            | 0.44                          | 0.073       |
| amber               | 598                  | 16           | 38                         | 0.9994       | 1.1                            | 0.084                         | 0.078       |
| red                 | 640                  | 18           | 45                         | 0.9999       | 6.4                            | 0.47                          | 0.074       |

### 284 3.2 Establishment of a HTS-Protocol

285 A high-throughput assay was developed based on the gold-standard microdilution method (Benkova  
286 et al.; Wiegand et al., 2008). Like the classic method, the HTS started with an overnight culture of the  
287 selected test organisms (*E. coli*, *S. aureus*, and *C. albicans*) and, separately, with the test compounds  
288 or extracts of interest (Figure 2). In the next step, a stock solution of the test extracts or compounds  
289 was generated in DMSO and successively diluted in media. MHB was used for the bacteria, while the  
290 yeast was cultured in RPMI, double strength. In Figure 2, a flow chart is displayed, including the  
291 pipetting scheme for the testing extracts. In Figure S1, the respective flow chart with a pipetting plan  
292 for pure compounds is shown. In contrast to the classic microdilution assay, a blank of each tested  
293 compound was needed to avoid false-negative effects in the final OD reading which determines the  
294 MIC. The next step was a preincubation step, followed by an irradiation step with the chosen  
295 wavelength and light doses. A dark control was conducted in parallel to examine the effect of light.  
296 After the (mock)-light treatment step, the plates were incubated for  $t = 24$ h. Finally, an OD  
297 measurement was performed to quantify the MIC, and -if needed- the treated dilutions were submitted  
298 to a CFU count to determine the MBC.

### 299 3.3 Establishment of the Photoantimicrobial Assay and its Validation with known PSs

300 In the first step, the light tolerance of the test organisms (i.e., *E. coli*, *S. aureus*, and *C. albicans*) was  
301 examined. To achieve this, the microorganisms were irradiated utilizing the five different LED-  
302 modules with light doses up to  $H = 30$  J/cm<sup>2</sup>. Under all tested light conditions (Figure 4), the irradiated  
303 populations were not affected compared to the non-irradiated control groups. Therefore, all observed  
304 effects will be due to a combined effect of the light and the test compound/extract.

## A new High-Throughput-Screening-assay for Photoantimicrobials

305

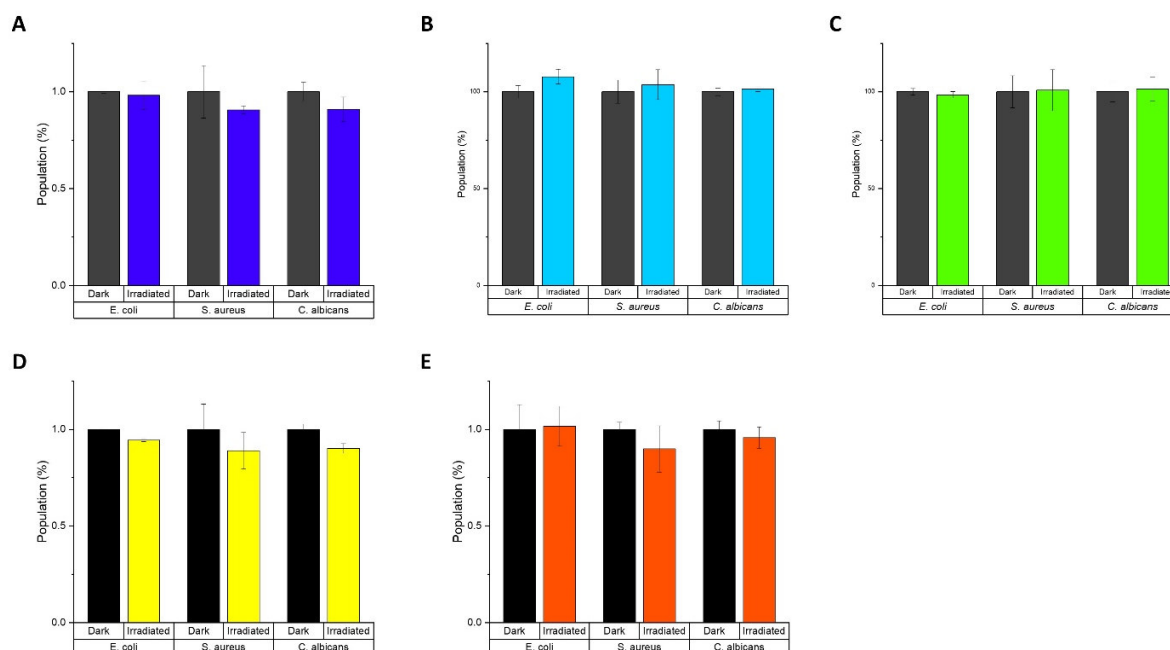

306

307 Figure 4: Effect of light irradiation on the growth of *E. coli*, *S. aureus*, and *C. albicans*. A)  $\lambda_{irr} = 428$  nm,  $H = 30$  J/cm<sup>2</sup>, B)  
 308  $\lambda_{irr} = 478$  nm,  $H = 30$  J/cm<sup>2</sup>, C)  $\lambda_{irr} = 523$  nm,  $H = 30$  J/cm<sup>2</sup>, D)  $\lambda_{irr} = 598$  nm,  $H = 9.3$  J/cm<sup>2</sup>, and E)  $\lambda_{irr} = 640$  nm,  $H = 30$   
 309 J/cm<sup>2</sup>.

310 Next, well-established photosensitizers were selected. In detail, phenalenone, curcumin, rose bengal  
 311 (RB), methylene blue (MB), and a *Hypericum perforatum* (HP) extract (photoactive ingredient:  
 312 hypericin) were chosen to validate the irradiation setup. These positive controls (PCs) were  
 313 characterized by absorption properties complementary to the LED-emission profiles (Figure 5). As  
 314 depicted, several LED-modules can activate individual PCs, as their absorbance bands fit more than  
 315 one LED-module. In Table 2, the PhotoMIC values – generated in accordance with the EUCAST  
 316 guidelines – are given. For each LED-module and tested microorganism, the most active PS is  
 317 represented in Figure 5, though for several LED-modules a selection of PSs worked. For example, the  
 318 growth of *S. aureus* was not only impeded with yellow light ( $\lambda_{irr} = 523$  nm, 30 J/cm<sup>2</sup>) and RB ( $c = 6$   
 319  $\mu\text{g/mL}$ , Table 2), but also with yellow light ( $\lambda_{irr} = 523$  nm, 30 J/cm<sup>2</sup>) and HP ( $c = 150$   $\mu\text{g/mL}$ ). The  
 320 MIC using RB ( $c = 6$   $\mu\text{g/mL}$ ), however, was more promising and is thus displayed in Table 2. The  
 321 doses-response curves are depicted in Figure S2-S6.

## A new High-Throughput-Screening-assay for Photoantimicrobials

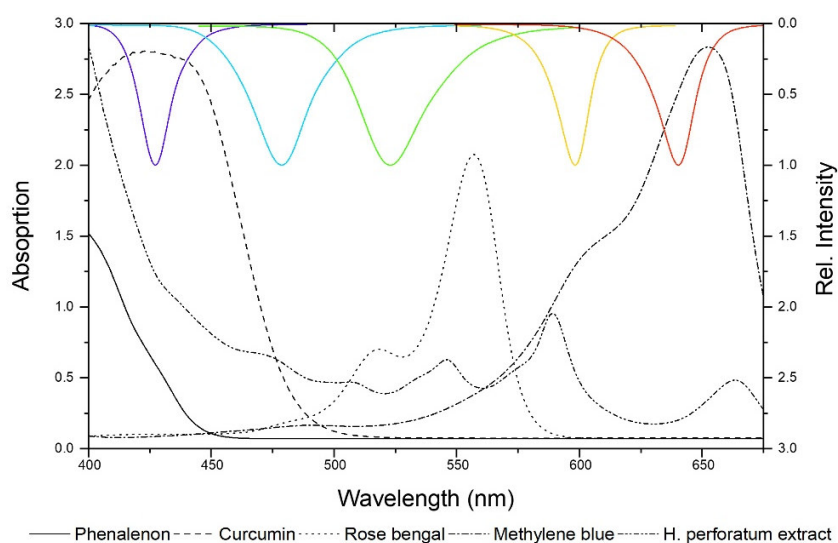

322

323 Figure 5 Absorbance spectra of PCs versus emission spectra of the LED modules ( $\lambda_{irr} = 428, 478, 523, 598, \text{ and } 640 \text{ nm}$   
324 from left to right).

325

326 Table 2: Overview of the minimal inhibition concentrations under irradiation (PhotoMIC) of the investigated positive  
327 controls regarding the three tested MOs. In the table, for each PS are given the PhotoMIC value with the utilized  
328 preincubation time (PI) and light dose ( $H$ ). The last column contains MICs of standard AB without light-irradiation.  
329

|                                        | 428 nm                                                                                | 478 nm                                                                                | 523 nm                                                                                | 598 nm                                                      | 640 nm                                                                             | Dark                                                |
|----------------------------------------|---------------------------------------------------------------------------------------|---------------------------------------------------------------------------------------|---------------------------------------------------------------------------------------|-------------------------------------------------------------|------------------------------------------------------------------------------------|-----------------------------------------------------|
| <i>C. albicans</i><br>(yeast)          | Curc<br>4 $\mu\text{g/mL}$<br>(10.9 $\mu\text{M}$ )<br>60 min<br>30 $\text{J/cm}^2$   | Curc<br>30 $\mu\text{g/mL}$<br>(81.5 $\mu\text{M}$ )<br>10 min<br>9.3 $\text{J/cm}^2$ | HP<br>50 $\mu\text{g/mL}$<br>10 min<br>30 $\text{J/cm}^2$                             | HP<br>200 $\mu\text{g/mL}$<br>10 min<br>9.3 $\text{J/cm}^2$ | MB<br>2.5 $\mu\text{g/mL}$<br>(7.8 $\mu\text{M}$ )<br>60 min<br>30 $\text{J/cm}^2$ | AMP<br>0.2 $\mu\text{g/mL}$<br>(0.2 $\mu\text{M}$ ) |
| <i>E. coli</i><br>(gram<br>negative)   | Curc<br>40 $\mu\text{g/mL}$<br>(108.6 $\mu\text{M}$ )<br>10 min<br>30 $\text{J/cm}^2$ | PN*<br>75 $\mu\text{g/mL}$<br>(416.2 $\mu\text{M}$ )<br>10 min<br>9.3 $\text{J/cm}^2$ | RB*<br>150 $\mu\text{g/mL}$<br>(154.1 $\mu\text{M}$ )<br>10 min<br>30 $\text{J/cm}^2$ | n.s.                                                        | n.s.                                                                               | CAP<br>2 $\mu\text{g/mL}$<br>(6.2 $\mu\text{M}$ )   |
| <i>S. aureus</i><br>(gram<br>positive) | Curc<br>4 $\mu\text{g/mL}$<br>(10.9 $\mu\text{M}$ )<br>10 min<br>9.3 $\text{J/cm}^2$  | PN<br>25 $\mu\text{g/mL}$<br>(138.7 $\mu\text{M}$ )<br>10 min<br>9.3 $\text{J/cm}^2$  | RB*<br>4 $\mu\text{g/mL}$<br>(4.1 $\mu\text{M}$ )<br>10 min<br>30 $\text{J/cm}^2$     | HP<br>150 $\mu\text{g/mL}$<br>10 min<br>9.3 $\text{J/cm}^2$ | n.d.                                                                               | ERY<br>1 $\mu\text{g/mL}$<br>(1.3 $\mu\text{M}$ )   |

330

331 Curc = Curcumin, PN = Phenalenone, RB = Rose bengal, HP = *Hypericum perforatum* extract; \* other PS worked as well. N.d. = Not detected.; n.s. = not selective; CAP = Chloramphicol; AMP = Amphotericin B; ERY = Erythromycin. For a full discussion see SI Chapter 1.

### 332 3.4 Mycochemical Analysis of Selected Cortinarius species

333 Based on their colorful appearance, the fruiting bodies of six different *Cortinarius* species (i.e.,  
334 *Cortinarius rufo-olivaceus*, *C. tophaceus*, *C. traganus*, *C. trivialis*, *C. venetus*, and *C. xanthophyllus*)  
335 were selected to evaluate our photo-antimicrobial assay (See Table S1 for collection information). In  
336 a first step, the dried material was extracted and the obtained extracts (see Table 3) were analyzed  
337 spectroscopically (UV-Vis, Figure S7) as well as chromatographically (i.e., HPLC combined with  
338 several hyphenated detectors (i.e., DAD, FLD, ELSD, MS see Figure S8-S10)). The results showed

## A new High-Throughput-Screening-assay for Photoantimicrobials

339 that the extract of *C. xanthophyllus* is not only the most complex but also the most intensely colored  
340 one (Figure S7 and S11). In detail, five intense peaks were detected at  $\lambda = 254$  nm (Table S3). The  
341 absorption maxima of the two major peaks ( $t_{r, \text{Peak 4}} = 28.3$  and  $t_{r, \text{Peak 5}} = 34.2$  min) were detected and  
342 equaled  $\lambda_{\text{max, Peak 4}} = 436$  nm and  $\lambda_{\text{max, Peak 5}} = 525$  nm (See Figure S12 UV-Vis spectra).

343 The mass spectrometric analysis revealed a mass of  $m/z = 283$   $[M-H]^-$  for Peak 4 and the chemical  
344 formula  $C_{16}H_{12}O_5$ . Taking the characteristic fluorescence properties of Peak 4 (Figure S8A) and the  
345 TLC work of Hofbauer (Hofbauer, 1983) into account, this peak was annotated as parietin and  
346 confirmed by comparison with an authentic sample (Figure S13). Also, Peak 2, 3, and 5 were  
347 characterized by anthraquinone-like absorption spectra (Figure S12). The red shift of the absorption  
348 maxima ( $\Delta\lambda = 57$ -87 nm, as compared to Peak 4 (parietin)) indicated an extended chromophore and  
349 thus hinted towards dimeric AQ-like structures. While Peak 2 ( $t_r = 25.4$  min) and Peak 3 ( $t_r = 26.9$  min)  
350 were also detected in the extract of *C. rufo-olivaceus*, they were putatively assigned as rufoolivacin A  
351 & C (Gill and Steglich, 1987; Zhang et al., 2009; Gao et al., 2010), which was in accordance with their  
352 mass peak of  $m/z = 557.2$   $[M+H]^+$  (Table S3). Peak 5 ( $m/z = 556.2$   $[M+H]^+$ ) was not assigned yet, but  
353 might be an oxidated derivative of phlegmacin (MW = 576.6 g/mol), which was described in  
354 *C. xanthophyllus* (Hofbauer, 1983). Plenty of dimeric anthraquinones are known from related  
355 Cortinariaceae (Gill and Steglich, 1987; Elsworth et al., 1999; Zhang et al., 2009; Gao et al., 2010) and  
356 thus seems to be a reasonable putative annotation. Further discussion of the metabolic profiles can be  
357 found in the supplementary part (Chapter 2.2.3).

358 Table 3: Initial weight of biomaterial of *Cortinarius* species and yield of extracts.

|                          | Biomaterial<br>[mg] | Yield of extract<br>[mg, (%)] | Visual appearance<br>extract |
|--------------------------|---------------------|-------------------------------|------------------------------|
| <i>C. rufo-olivaceus</i> | 1784.9              | 91.0 (5.1)                    | Dark red, dull               |
| <i>C. venetus</i>        | 1944.0              | 26.7 (1.4)                    | Light yellow, greasy,        |
| <i>C. tophaceus</i>      | 1643.7              | 14.6 (0.9)                    | Light yellow, muddy          |
| <i>C. traganus</i>       | 1709.7              | 18.2 (1.1)                    | Dark yellow, muddy           |
| <i>C. trivialis</i>      | 1958.1              | 22.0 (1.1)                    | Dark yellow, greasy          |
| <i>C. xanthophyllus</i>  | 1051.8              | 26.6 (2.5)                    | Purple, earthy, powder       |

### 359 3.5 Singlet-Oxygen Detection assay (DMA-Assay)

360 The obtained extracts were submitted to the recently developed singlet oxygen high-throughput assay  
361 (DMA-assay, (Siewert et al., 2019)). Out of the six investigated extracts, two, namely *C. xanthophyllus*  
362 and *C. rufo-olivaceus*, showed the ability to produce  $^1O_2$  after being irradiated with blue light (Table  
363 4). *C. xanthophyllus* was the most active extract: Irradiated at  $\lambda = 468 \pm 27$  nm ( $24.8$  J/cm<sup>2</sup>), the extract  
364 produced 187% singlet oxygen as compared to the well-known photosensitizer phenalen-1-one  
365 (Schmidt et al., 1994; Espinoza et al., 2016). Hence, this extract originating from natural sources  
366 showed promising photosensitizing activity as promising as those of synthetic compounds, such as  
367 phenalene-1-one.  
368

369

## A new High-Throughput-Screening-assay for Photoantimicrobials

370 Table 4: Results of the DMA-assay (blue light irradiation relative to phenalene-1-one).

|                          | Singlet Oxygen Production [%] | Standard deviation [%] |
|--------------------------|-------------------------------|------------------------|
| <i>C. rufo-olivaceus</i> | 49.6                          | 2.55                   |
| <i>C. tophaceus</i>      | 3.1                           | 1.7                    |
| <i>C. traganus</i>       | 0.2                           | 1.1                    |
| <i>C. trivialis</i>      | 4.2                           | 2.0                    |
| <i>C. venetus</i>        | 4.4                           | 0.2                    |
| <i>C. xanthophyllus</i>  | 187.1                         | 2.1                    |

371 **3.6 *Cortinarius xanthophyllus* contains photoantimicrobials active against**  
 372 ***Staphylococcus aureus* and *Candida albicans***

373 Submitting all six extracts to the (photo)antimicrobial assay revealed that all extracts are inactive ( $c >$   
 374  $50 \mu\text{g/mL}$ ) under the exclusion of light (Figure 6-8). Under light-irradiation, however, the activity of  
 375 the purple extract of *C. xanthophyllus* was significantly enhanced: The growth of the gram-positive  
 376 bacterium *S. aureus* (Figure 8) was completely inhibited with an extract concentration as low as  $c =$   
 377  $7.5 \mu\text{g/mL}$  and a light dose of  $H = 30 \text{ J/cm}^2$  ( $\lambda = 478 \text{ nm}$ ). This also holds true for the photoactivity  
 378 against the yeast *C. albicans*, where an extract concentration of  $c = 75 \mu\text{g/mL}$  ( $H = 30 \text{ J/cm}^2$ ) led to  
 379 complete growth inhibition (Figure 6). Against the gram-negative *E. coli*, however, *C. xanthophyllus*  
 380 was inactive in the dark and under irradiation (Figure 7).

381 A weak enhancement of the growth inhibition effect was also seen for the *C. rufo-olivaceus* extract  
 382 against *S. aureus* ( $\text{IC}_{50} \sim 50 \mu\text{g/mL}$ ). Nevertheless, this extract did not affect *C. albicans* under the  
 383 tested conditions.

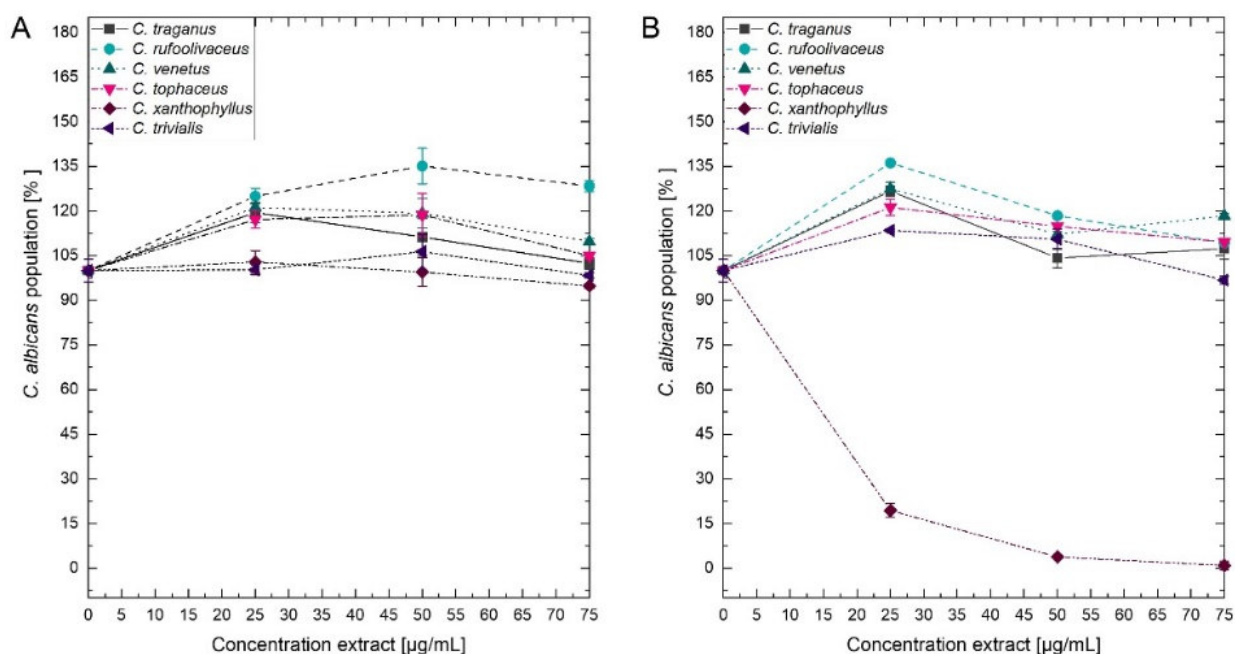

384 Figure 6: Dose-response curves of *C. albicans* treated with *Cortinarius* extracts. On the left side (A) dark controls are  
 385 shown. The right graph (B) represents the irradiated experiments ( $\lambda = 470 \text{ nm}$ ,  $H = 30 \text{ J/cm}^2$ ,  $\text{PI} = 60 \text{ min}$ ).  
 386

## A new High-Throughput-Screening-assay for Photoantimicrobials

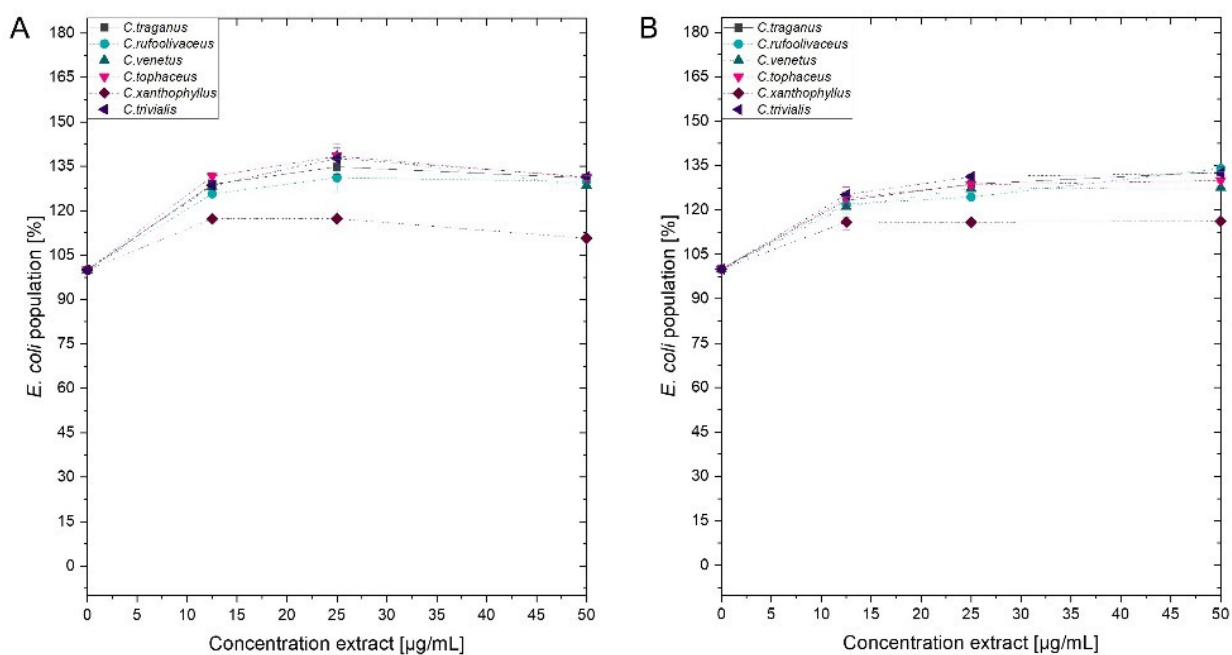

387  
388  
389  
390

Figure 7: Dose-response curves of *E. coli* treated with *Cortinarius* extracts. On the left side (A) dark controls are shown. The right graph (B) represents the irradiated experiments ( $\lambda = 470$  nm,  $30$  J/cm<sup>2</sup>, PI = 60 min).

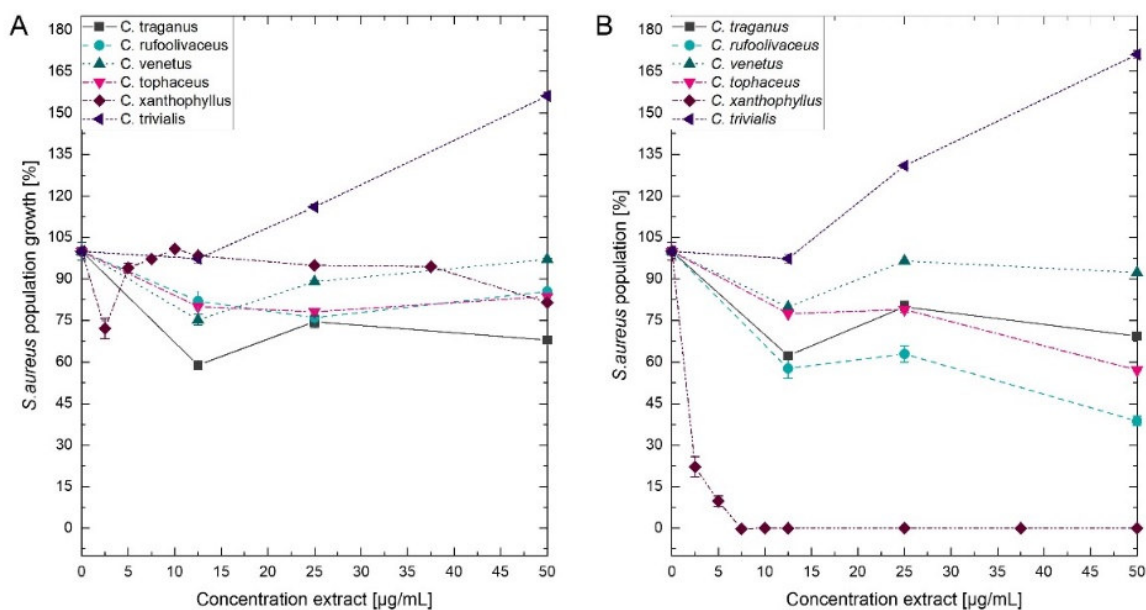

391

392 Figure 8: Dose-response curves of *S. aureus* treated with *Cortinarius* extracts. A) Growth inhibition under dark conditions.  
393 B) Growth inhibition under irradiation conditions ( $\lambda = 470$  nm,  $H = 30$  J/cm<sup>2</sup>, PI = 60 min).

394  
395

## A new High-Throughput-Screening-assay for Photoantimicrobials

### 396 4 Discussion

397 The hypothesis we wanted to test in course of this study was that light is a neglected co-factor in  
398 antimicrobial screening assays. Therefore, a convenient HTS-screening assay based on the EUCAST  
399 protocol was established and validated. In a first step, an innovative LED-panel was required achieving  
400 a homogenous irradiation of a 96-well plate. Finally, the hypothesis was be tested with a set of six  
401 different *Cortinarius* species.

#### 402 4.1 The SciLED irradiation system and its improved uniform irradiance distribution

403 To achieve the first objective – the homogenous irradiation of a 96-well plate – the distance and number  
404 of the LEDs was optimized by simulations until the coefficient of variation  $cv$  was estimated to be less  
405 than one percent. Irradiance measurements and chemical actinometer measurements (Figure 3)  
406 confirmed the homogeneous irradiance. Nevertheless, the actual coefficient of variation from  
407 irradiance measurements was in the range between seven to nine percent. Deviations between the  
408 simulation and the measurement can be attributed to differences between the modeled and the actual  
409 radiant intensity distribution of the LED, variations in the radiometric power of individual LEDs, and  
410 measurement uncertainties.

411 Although the real uniformity ( $cv = 8\%$ ) of the irradiation system with non-equidistant LED  
412 arrangement presented in this work was less than the expected uniformity from the simulations  
413 ( $cv_{sim} = 0.08\%$ ), the achieved homogeneity over the whole sample area was still significantly better  
414 compared to equidistant LED positioning. An optical simulation of a  $6 \times 4$  LED array with an  
415 equidistant arrangement ( $\Delta x = 35$  mm,  $\Delta y = 35$  mm) resulted in a less homogeneous irradiance  
416 distribution ( $cv_{sim} = 5\%$ ) compared to the existing non-equidistant arrangement ( $cv_{sim} = 0.08\%$ ).  
417 To understand the positive effects of a non-equidistant positioning, the non-uniform radiant intensity  
418 distribution of LEDs must be taken into account. Considering just one LED, the resulting irradiance  
419 distribution on the irradiated plane is decreasing nonlinear with an increased distance from the center.  
420 Placing two LEDs with a certain distance  $d$  next to each other, parts of the irradiance will overlap. Due  
421 to the superposition principle, the resulting irradiance distribution is the sum of every single one (Figure  
422 9). Depending on the distance, the irradiance in the intermediate area between the two LEDs is  
423 enhanced, reduced, or constant. This dependence of the irradiance distribution from the LED distance  
424 is shown in Figure 9 for three different distances  $d$ . Using an array of  $n \times m$  LEDs with  $n > 2$  and  
425  $m \geq 1$ , the overlapping effect is amplified. To achieve a uniform distribution, the right LED  
426 arrangement is crucial. The LED distances for a uniform irradiance depends on the number of LEDs,  
427 the viewing angle  $\theta_{1/2}$  and the working distance  $z$ . As a rule of thumb, for LEDs with a wide viewing  
428 angle, the distances of the inner LEDs should be wider than the distance of the outer ones.

## A new High-Throughput-Screening-assay for Photoantimicrobials

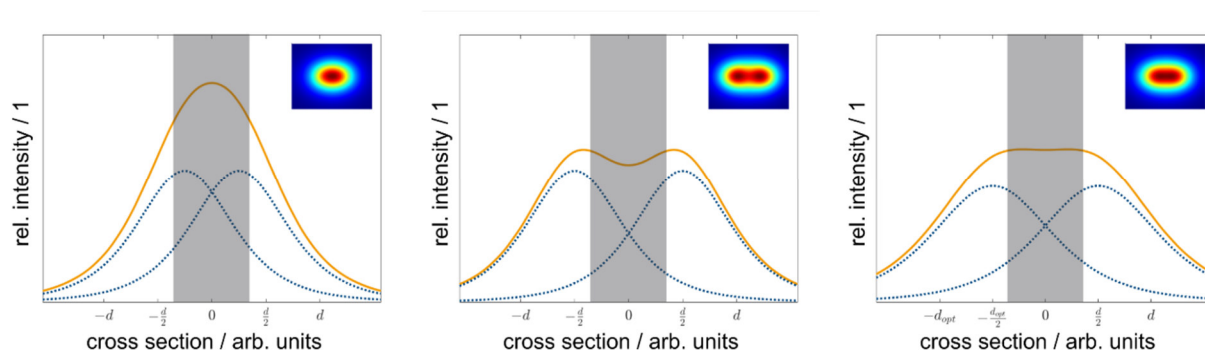

Figure 9. Side-view of the irradiance distribution depending on LED distance. Depending on the LED distance  $d$ , the resulting irradiance from the two overlapping LED irradiance distributions at the sample plane differs. Individual LED irradiance distributions are represented as dotted lines (blue), and the resulting distributions are shown as solid lines (orange). The grey bar indicates the max. width of the sample plate. If the LED distance  $d$  is too low, the overlap in the center is high, and the resulting irradiance is enhanced (A). For a too large LED distance  $d$ , the overlap is small, and the resulting irradiance is reduced (B). Using the optimal LED distance  $d_{opt}$ , each LED contributes the right amount, and the resulting irradiance in the center is constant (C).

429 However, a uniform irradiance comes with a price. Due to the positioning scheme, the average  
430 irradiance decreased by ten percent compared to the equidistant arrangement. Simulations of different  
431 equidistant LED positions have shown that the resulting average irradiance increased by reducing the  
432 spacing between the individual LED, yet the uniformity decreased. Depending on the purpose of the  
433 irradiation system, a tradeoff between irradiance and homogeneity is necessary. For this work, a  
434 uniform distribution was essential to accomplish comparable irradiation conditions within the 96-well  
435 plate.

436 Optical characterization measurements shown in Table 1 indicate that the actual peak wavelengths are  
437 within the specifications from the datasheets for all but the red LEDs. With a nominal wavelength  
438 range from  $\lambda = 624$  nm to  $\lambda = 634$  nm given by the manufacturer and an actual peak wavelength of  $\lambda$   
439 = 640 nm a divergence was observed. This deviation may result from a different characterization  
440 method in the datasheet. The LED manufacturer refers to a dominant wavelength, which takes the  
441 relative spectral sensitivity of human visual perception of brightness (luminosity function) into account  
442 (Lumileds Holding B.V. 2019). The peak wavelength in this work refers to an absolute spectral  
443 measurement without considering the luminosity function of the human eye. Irradiation measurements  
444 at the sample distance revealed a variation in the achieved intensities from a maximum irradiance of  
445  $E_m = 13 \pm 1.0$  mW/cm<sup>2</sup> for violet LEDs and a minimum irradiance of  $E_m = 1.1 \pm 0.08$  mW/cm<sup>2</sup> for  
446 amber LEDs. These fluctuations can be explained by different designs and composition of each single-  
447 color LED. To achieve different emission wavelengths, different semiconductor combinations with  
448 different dopings are used in addition to various packaging layouts (Schubert, 2006). These intrinsic  
449 variations result in different irradiances.

### 450 4.2 Establishment and Validation of a Screening Photoantimicrobial Assay

451 The EUCAST microdilution assay – being launched to allow a better inter-laboratory reproducibility –  
452 inspired the established photoantimicrobial HTS. While antimicrobial assays heavily depend on the  
453 testing conditions, one aim of EUCAST is to boost the development of new antimicrobials by the  
454 enablement of inter-laboratory comparisons. Specifically, photoantimicrobials are part of a promising  
455 treatment alternative, the so-called Photoantimicrobial chemotherapy (PACT) or antimicrobial  
456 photodynamic inhibition (aPDI) (Wainwright, 2009). While the therapy depends on a completely



## A new High-Throughput-Screening-assay for Photoantimicrobials

457 different mechanism (i.e., ROS production due to the interplay of light and a photosensitizer) compared  
458 to well-established antibiotics, it is active against multi-resistant pathogens and the risk of resistance-  
459 development is relatively low (Maisch, 2015). Nevertheless, despite these attractive aspects, wide  
460 acceptance of PACT is lacking. One limitation next to others (Wainwright, 2009) is the limited  
461 throughput of established assays: Often, one PS-candidate and one concentration are irradiated by the  
462 time, leading to exorbitantly time consuming experiments. On the other hand, testing multiple  
463 parameters (concentrations, microorganism, or drug-candidates) on one plate lacked comparability due  
464 to an uneven light distribution (Ogonowska et al., 2019). Thus, the limited throughput impeded the  
465 study of extensive libraries of PS-candidate and hence the classical lead-to-hit approach of medicinal  
466 chemistry.

467 The EUCAST protocol tests an antibiotic (AB) usually with ten concentrations and defines the MIC  
468 by the value which is the lowest concentration inhibiting the growth completely as determined by the  
469 lack of turbidity. To test photoantimicrobials, a blank measurement of each concentration is necessary.  
470 The test solutions are colored, and the blank subtraction is necessary to avoid false-negative read-outs  
471 during the OD measurement. Furthermore, a triplicate of each concentration is needed account for the  
472 biological variability. This led us to the, in Figure S8 displayed, pipetting scheme, which allows testing  
473 the effect of two PSs against one microorganism. While for classic EUCAST susceptibility assays only  
474 these variables (i.e., tested microorganism and concentration range of the AB) are crucial, the number  
475 of variables exceeds in the photoantimicrobial assay: In addition to the preincubation time, irradiation  
476 time, and light doses, as well as light power and the irradiation wavelength itself are of interest.

477 The established scheme (Figure 2) and the workability were tested with the known PSs curcumin, rose  
478 bengal (RB), methylene blue (MB), phenalenone (PN), and a *Hypericum* extract (HP). The irradiation  
479 wavelength changed according to the absorbance pattern of the PS (Figure 5). The light dose was set  
480 to  $H = 30 \text{ J/cm}^2$ , which equated to the utilized dose from several published studies (Cieplik et al., 2016;  
481 de Annunzio et al., 2018; Merigo et al., 2019) and furthermore was shown to be non-toxic against the  
482 tested microorganisms alone (Figure 4). While this is per se not as important as for photocytotoxicity  
483 (Wainwright, 2009) studies, we choose this dose to truly see the light-effect of the PSs. PhotoMIC  
484 values were generated for this variety of PSs against the pathogenic microorganisms *S. aureus*,  
485 *C. albicans*, and *E. coli* utilizing the LED modules with an irradiation wavelength of  $\lambda_{\text{irr}} = 428, 478,$   
486  $523, 598,$  and  $640 \text{ nm}$ . To the best knowledge of the authors, Table 2 represents the first comprehensive  
487 overview of the PhotoMIC values of common PSs. Although literature values cannot be easily  
488 compared due to the discussed, yet not standardized parameters (Haukvik et al., 2009), our obtained  
489 values fit the reported ones (See Supplementary Part, Chapter 1.2 for the full discussion). An  
490 international agreement on standard values for the additional irradiation parameters would be helpful  
491 in the process of hit-lead optimization.

492 The gram-negative bacteria *E. coli* was resistant against the tested lipophilic and neutral PSs especially  
493 during the irradiation with yellow and red light (Table 2). This is well-known (see discussion SI chapter  
494 4.1) and reasoned by their negatively charged membrane (Minnock et al., 2000; Bresolí-Obach et al.,  
495 2018; Galstyan et al., 2018).

496 To allow a screening of biological sources such as plant extracts or fungal extracts in the frame of bio-  
497 activity guided isolation, the pipetting scheme displayed in Figure 2 was established. Due to the even  
498 light distribution, up to seven extracts à three concentrations can be screened against one pathogenic  
499 microorganism in biological triplicates. By a slight modification of the testing logic on the other hand,  
500 a fast determination of PhotoMIC against a broader variety of microorganisms in analogy to the  
501 EUCAST scheme is possible (i.e., up to seven microorganisms against one PSs, no triplicates).

## A new High-Throughput-Screening-assay for Photoantimicrobials

### 502 4.3 Utilization of the Screening Assay Yielded a Promising Hit

503 As a sample set, extracts of six different *Cortinarius* species (Table 3 and Table S1) were investigated.  
504 The results of the antimicrobial assay (dark conditions) were in line with the results of Tiralongo and  
505 colleagues (Beattie et al., 2010). They investigated 117 different Australian *Cortinarius* species and  
506 could show that two-third of the species held an IC<sub>50</sub> between c = 20 µg/mL and c = 200 µg/mL against  
507 the gram-positive bacterium *S. aureus*. In the present study, we determined MICs (instead of IC<sub>50</sub>), and  
508 were, under light exclusion, not able to see full inhibition of microbial growth with extract  
509 concentrations up to c = 75 µg/mL.

510 As shown in Figure 6, the addition of blue light exhilarated the antimicrobial activity of the intensely  
511 colored *Cortinarius* extract by more than tenfold: The extract of *C. xanthophyllus* was characterized  
512 by a PhotoMic of c = 7.5 µg/mL and thus was even more effective than the established PS phenalenone  
513 (MIC = 25 µg/mL). In addition, the extract showed promising activity against *C. albicans* (Figure 6).  
514 Interestingly, this activity seems to be uptake depended, as a preincubation time of only ten minutes  
515 (instead of PI = 60 min) showed no effect (Figure S14). Mycochemical analysis of the extract  
516 implicated three potential photoactive compounds (Figure S11). These pigments were tentatively  
517 annotated as rufoolivacin, parietin, and as an anhydro-phlegmacin-like compound (Table S3). Analysis  
518 of the HPLC-DAD chromatogram recorded at λ = 478 nm indicated that Peak 4 and Peak 5 absorb  
519 most of the incoming light, and thus might be responsible for the observed photoantimicrobial action.  
520 Parietin, usually isolated from the lichen *Xanthoria parietina* is known for its photoactive properties  
521 against cancer cells (Mugas et al., 2021) and against *S. aureus* (Comini et al., 2017). The chemical  
522 structure of Peak 5 is not assured yet and hampered by the limited availability of fungal material due  
523 to the rare occurrence of *C. xanthophyllus*. This Mediterranean species is listed on the red-list and thus  
524 endangered (Tingstad et al., 2017). Nevertheless, applying modern phytochemical techniques (e.g.,  
525 LC-SPE-NMR, FBMN-assisted isolation) might help to reveal its chemical space and is part of future  
526 work.

### 527 5 Conclusion

528 The development of an uniform emitting LED-panel was presented, allowing a homogeneous  
529 irradiation of a complete 96-well plate. As consequence, a convenient HTS-assay to determine photo-  
530 activated minimal inhibitory concentrations (PhotoMIC) of pure compounds and extracts was  
531 established based on the EUCAST guideline. The light tolerance of the utilized model organisms (i.e.,  
532 *C. albicans*, *E. coli*, and *S. aureus*) was tested and revealed that all microorganisms can cope with a  
533 light dose of  $H = 9.3 \text{ J/cm}^2$  or even  $H = 30 \text{ J/cm}^2$  of every tested wavelength (i.e., up to  $9.3 \text{ J/cm}^2$  for  $\lambda$   
534 = 598, up to  $30 \text{ J/cm}^2$  for  $\lambda = 428, 478, 528, 640 \text{ nm}$ ). Standard photosensitizers were used to validate  
535 the assay and yielded the first comprehensive table accumulating a broad array of PhotoMic values  
536 under different irradiation conditions and against different pathogenic MOs. Lastly, submitting a test  
537 sample set of fungal extracts generated from the colored fruiting bodies of *Cortinarius rufo-olivaceus*,  
538 *C. tophaceus*, *C. traganus*, *C. trivialis*, *C. venetus*, and *C. xanthophyllus* showed that light is indeed  
539 one co-factor amplifying a moderate antimicrobial action of natural products. The most intensely  
540 colored extract, i.e., the one of *C. xanthophyllus*, showed the most promising activity of  
541 PhotoMIC = 7.5 µg/mL against *S. aureus*. The extract was also photoactive against *C. albicans*.  
542 Mycochemical analysis identified two peaks putatively responsible for the effect. One of them being  
543 the well-known natural PS parietin from the lichen *Xanthoria parientina* and the other one being a  
544 photochemically unexplored dimeric AQ.

545

## A new High-Throughput-Screening-assay for Photoantimicrobials

### 546 **6 Conflict of Interest**

547 The authors declare that the research was conducted in the absence of any commercial or financial  
548 relationships that could be construed as a potential conflict of interest.

### 549 **7 Author Contributions**

550 J.F. performed the antimicrobial assays and majority of the mycochemical analysis. F.H. performed  
551 the DMA-assay. H.S. and R.S. designed the irradiation device. H.S. performed the instrumental  
552 characterization. D.D. and D.J.A. performed pre-test of the AntiMic assay. P.V. contributed to the  
553 conception of the AntiMic assay. U.P. provided the biomaterial and phylogenetic input. B.S. designed  
554 the research, analyzed the mycochemical part, and wrote the manuscript with contributions of H.S. and  
555 J.F. All authors contributed to the final version of the manuscript.

### 556 **8 Funding**

557 The Austrian Science Fund (FWF P31950, BS and FWF T862, PV), the Tyrolean Science Fund, and  
558 the University of Innsbruck are thanked for their support.

### 559 **9 Acknowledgments**

560 H. Stuppner is kindly acknowledged for his support and input. Sarah Flatscher is acknowledged for  
561 her skillful help characterizing the LEDs.

### 562 **10 Supplementary Material**

563 See attached document.

### 564 **11 References**

565 B.V., L.H. (2019). *DS198 LUXEON CZ Color Line Product Datasheet* [Online]. Available:  
566 <https://www.lumileds.com/products/color-leds/luxeon-cz-color-line/> [Accessed 01.02.2021  
567 2021].

568 Bajgar, R., Pola, M., Hosik, J., Turjanica, P., Cengery, J., and Kolarova, H. (2020). New planar light  
569 source for the induction and monitoring of photodynamic processes in vitro. *Journal of*  
570 *Biological Physics* 46(1), 121-131. doi: 10.1007/s10867-020-09544-7.

571 Balouiri, M., Sadiki, M., and Ibsouda, S.K. (2016). Methods for in vitro evaluating antimicrobial  
572 activity: A review. *Journal of Pharmaceutical Analysis* 6(2), 71-79. doi:  
573 <https://doi.org/10.1016/j.jpha.2015.11.005>.

574 Basnet, B.B., Liu, L., Bao, L., and Liu, H. (2017). Current and future perspective on antimicrobial  
575 and anti-parasitic activities of *Ganoderma* sp.: an update. *Mycology* 8(2), 111-124. doi:  
576 10.1080/21501203.2017.1324529.

577 Beattie, K.D., Rouf, R., Gander, L., May, T.W., Ratkowsky, D., Donner, C.D., et al. (2010).  
578 Antibacterial metabolites from Australian macrofungi from the genus *Cortinarius*.  
579 *Phytochemistry* 71(8-9), 948-955. doi: 10.1016/j.phytochem.2010.03.016.

580 Benkova, M., Soukup, O., and Marek, J. Antimicrobial susceptibility testing: currently used methods  
581 and devices and the near future in clinical practice. *Journal of Applied Microbiology* n/a(n/a).  
582 doi: 10.1111/jam.14704.

## A new High-Throughput-Screening-assay for Photoantimicrobials

- 583 Berenbaum, M. (1995). Phototoxicity of plant secondary metabolites: Insect and mammalian  
584 perspectives. *Archives of Insect Biochemistry and Physiology* 29(2), 119-134. doi:  
585 10.1002/arch.940290204.
- 586 Betts, J.T. (1976). Solving the nonlinear least square problem: Application of a general method.  
587 *Journal of Optimization Theory and Applications* 18(4), 469-483. doi: 10.1007/BF00932656.
- 588 Bresolí-Obach, R., Gispert, I., Peña, D.G., Boga, S., Gulias, Ó., Agut, M., et al. (2018).  
589 Triphenylphosphonium cation: A valuable functional group for antimicrobial photodynamic  
590 therapy. *Journal of Biophotonics* 11(10), e201800054. doi:  
591 <https://doi.org/10.1002/jbio.201800054>.
- 592 Butler, M.C., Itotia, P.N., and Sullivan, J.M. (2010). A High-Throughput Biophotonics Instrument to  
593 Screen for Novel Ocular Photosensitizing Therapeutic Agents. *Investigative Ophthalmology*  
594 *& Visual Science* 51(5), 2705-2720. doi: 10.1167/iovs.08-2862.
- 595 Calin, M.A., and Parasca, S.V. (2009). Light sources for photodynamic inactivation of bacteria.  
596 *Lasers Med Sci* 24(3), 453-460. doi: 10.1007/s10103-008-0588-5.
- 597 Chen, D., Zheng, H., Huang, Z., Lin, H., Ke, Z., Xie, S., et al. (2012). Light-Emitting Diode-Based  
598 Illumination System for *In Vitro* Photodynamic Therapy. *International Journal of*  
599 *Photoenergy* 2012, 920671. doi: 10.1155/2012/920671.
- 600 Cieplik, F., Pummer, A., Leibl, C., Regensburger, J., Schmalz, G., Buchalla, W., et al. (2016).  
601 Photodynamic Inactivation of Root Canal Bacteria by Light Activation through Human  
602 Dental Hard and Simulated Surrounding Tissue. *Front Microbiol* 7, 929. doi:  
603 10.3389/fmicb.2016.00929.
- 604 Coleman, T.F., and Li, Y. (1994). On the convergence of interior-reflective Newton methods for  
605 nonlinear minimization subject to bounds. *Mathematical Programming* 67(1), 189-224. doi:  
606 10.1007/BF01582221.
- 607 Coleman, T.F., and Li, Y. (1996). An Interior Trust Region Approach for Nonlinear Minimization  
608 Subject to Bounds. *SIAM Journal on Optimization* 6(2), 418-445. doi: 10.1137/0806023.
- 609 Comini, L.R., Moran Vieyra, F.E., Mignone, R.A., Paez, P.L., Laura Mugas, M., Konigheim, B.S., et  
610 al. (2017). Parietin: an efficient photo-screening pigment in vivo with good photosensitizing  
611 and photodynamic antibacterial effects in vitro. *Photochemical & Photobiological Sciences*  
612 16(2), 201-210. doi: 10.1039/C6PP00334F.
- 613 de Annunzio, S.R., de Freitas, L.M., Blanco, A.L., da Costa, M.M., Carmona-Vargas, C.C., de  
614 Oliveira, K.T., et al. (2018). Susceptibility of *Enterococcus faecalis* and *Propionibacterium*  
615 *acnes* to antimicrobial photodynamic therapy. *Journal of Photochemistry and Photobiology*  
616 *B: Biology* 178, 545-550. doi: <https://doi.org/10.1016/j.jphotobiol.2017.11.035>.
- 617 Deveau, A., Bonito, G., Uehling, J., Paoletti, M., Becker, M., Bindschedler, S., et al. (2018).  
618 Bacterial–fungal interactions: ecology, mechanisms and challenges. *FEMS Microbiology*  
619 *Reviews* 42(3), 335-352. doi: 10.1093/femsre/fuy008.
- 620 Dos Santos, R.F., Campos, B.S., Rego Filho, F., Moraes, J.O., Albuquerque, A.L.I., da Silva,  
621 M.C.D., et al. (2019). Photodynamic inactivation of *S. aureus* with a water-soluble curcumin  
622 salt and an application to cheese decontamination. *Photochem Photobiol Sci* 18(11), 2707-  
623 2716. doi: 10.1039/c9pp00196d.
- 624 Downum, K.R. (1992). Light-activated plant defence. *New Phytologist* 122(3), 401-420. doi:  
625 10.1111/j.1469-8137.1992.tb00068.x.

## A new High-Throughput-Screening-assay for Photoantimicrobials

- 626 Dresch, P., D'Aguzzo, M.N., Rosam, K., Grienke, U., Rollinger, J.M., and Peintner, U. (2015).  
627 Fungal strain matters: colony growth and bioactivity of the European medicinal polypores  
628 *Fomes fomentarius*, *Fomitopsis pinicola* and *Piptoporus betulinus*. *AMB Express* 5(1), 4. doi:  
629 10.1186/s13568-014-0093-0.
- 630 Elsworth, C., Gill, M., Giménez, A., M. Milanovic, N., and Raudies, E. (1999). Pigments of fungi.  
631 Part 50.1 Structure, biosynthesis and stereochemistry of new dimeric dihydroanthracenones of  
632 the phlegmacin type from *Cortinarius sinapicolor* Cleland. *Journal of the Chemical Society,*  
633 *Perkin Transactions 1* (2), 119-126. doi: 10.1039/A808340A.
- 634 Espinoza, C., Trigos, Á., and Medina, M.E. (2016). Theoretical Study on the Photosensitizer  
635 Mechanism of Phenalenone in Aqueous and Lipid Media. *The Journal of Physical Chemistry*  
636 *A* 120(31), 6103-6110. doi: 10.1021/acs.jpca.6b03615.
- 637 Flors, C., and Nonell, S. (2006). Light and Singlet Oxygen in Plant Defense Against Pathogens:  
638 Phototoxic Phenalenone Phytoalexins. *Accounts of Chemical Research* 39(5), 293-300. doi:  
639 10.1021/ar0402863.
- 640 Frey-Klett, P., Burlinson, P., Deveau, A., Barret, M., Tarkka, M., and Sarniguet, A. (2011). Bacterial-  
641 Fungal Interactions: Hyphens between Agricultural, Clinical, Environmental, and Food  
642 Microbiologists. *Microbiology and Molecular Biology Reviews* 75(4), 583-609. doi:  
643 10.1128/mubr.00020-11.
- 644 Galstyan, A., Putze, J., and Dobrindt, U. (2018). Gaining Access to Bacteria through (Reversible)  
645 Control of Lipophilicity. *Chemistry – A European Journal* 24(5), 1178-1186. doi:  
646 <https://doi.org/10.1002/chem.201704562>.
- 647 Gao, J.-M., Qin, J.-C., Pescitelli, G., Di Pietro, S., Ma, Y.-T., and Zhang, A.-L. (2010). Structure and  
648 absolute configuration of toxic polyketide pigments from the fruiting bodies of the fungus  
649 *Cortinarius rufo-olivaceus*. *Organic & Biomolecular Chemistry* 8(15), 3543-3551. doi:  
650 10.1039/C002773A.
- 651 Gill, M., and Steglich, W. (1987). Pigments of fungi (Macromycetes). *Fortschr Chem Org Naturst*  
652 51, 1-317.
- 653 Hammerle, F., Bingger, I., Pannwitz, A., Magnutzkie, A., Gstir, R., Rutz, A., et al. (2020).  
654 Biphyscion – The First Photo-Active Pigment of Mushrooms (*Cortinarius uliginosus*)  
655 Indicates a New Defense Strategy in the Subgenus Dermocyboid *Cortinari* and is a Highly  
656 Active Photosensitizer Inducing Apoptosis. *submitted*.
- 657 Haukvik, T., Bruzell, E., Kristensen, S., and Tønnesen, H.H. (2009). Photokilling of bacteria by  
658 curcumin in different aqueous preparations. Studies on curcumin and curcuminoids XXXVII.  
659 *Pharmazie* 64(10), 666-673.
- 660 Hofbauer, C. (1983). *Chemotaxonomische Untersuchungen in der Untergattung Phlegmacium*.
- 661 Hopkins, S.L., Siewert, B., Askes, S.H.C., Veldhuizen, P., Zwier, R., Heger, M., et al. (2016). An in  
662 vitro cell irradiation protocol for testing photopharmaceuticals and the effect of blue, green,  
663 and red light on human cancer cell lines. *Photochemical & Photobiological Sciences* 15(5),  
664 644-653. doi: 10.1039/C5PP00424A.
- 665 Hudson, J.B., and Towers, G.H. (1991). Therapeutic potential of plant photosensitizers. *Pharmacol*  
666 *Ther* 49(3), 181-222.

## A new High-Throughput-Screening-assay for Photoantimicrobials

- 667 Hyde, K.D., Xu, J., Rapior, S., Jeewon, R., Lumyong, S., Niego, A.G.T., et al. (2019). The amazing  
668 potential of fungi: 50 ways we can exploit fungi industrially. *Fungal Diversity* 97(1), 1-136.  
669 doi: 10.1007/s13225-019-00430-9.
- 670 Katz, S., Backeris, P., Merck, C., Suprun, M., D'Souza, S., Bishop, D.F., et al. (2018). Design and  
671 validation of an open-source modular Microplate Photoirradiation System for high-  
672 throughput photobiology experiments. *PLOS ONE* 13(10), e0203597. doi:  
673 10.1371/journal.pone.0203597.
- 674 Künzler, M. (2018). How fungi defend themselves against microbial competitors and animal  
675 predators. *PLOS Pathogens* 14(9), e1007184. doi: 10.1371/journal.ppat.1007184.
- 676 Lachowicz, J.I., Dalla Torre, G., Cappai, R., Randaccio, E., Nurchi, V.M., Bachor, R., et al. (2020).  
677 Metal self-assembly mimosine peptides with enhanced antimicrobial activity: towards a new  
678 generation of multitasking chelating agents. *Dalton Transactions* 49(9), 2862-2879. doi:  
679 10.1039/C9DT04545G.
- 680 Lee, I.H., Cho, Y., and Lehrer, R.I. (1997). Effects of pH and salinity on the antimicrobial properties  
681 of clavanins. *Infection and Immunity* 65(7), 2898-2903.
- 682 Lewis, K. (2020). The Science of Antibiotic Discovery. *Cell* 181(1), 29-45. doi:  
683 <https://doi.org/10.1016/j.cell.2020.02.056>.
- 684 Maisch, T. (2015). Resistance in antimicrobial photodynamic inactivation of bacteria. *Photochemical  
685 & Photobiological Sciences* 14(8), 1518-1526. doi: 10.1039/C5PP00037H.
- 686 Merigo, E., Conti, S., Ciociola, T., Manfredi, M., Vescovi, P., and Fornaini, C. (2019). Antimicrobial  
687 Photodynamic Therapy Protocols on Streptococcus mutans with Different Combinations of  
688 Wavelengths and Photosensitizing Dyes. *Bioengineering (Basel)* 6(2). doi:  
689 10.3390/bioengineering6020042.
- 690 Microbiology, E.C.f.A.S.T.o.t.E.S.o.C., and Diseases, I. (2003). Determination of minimum  
691 inhibitory concentrations (MICs) of antibacterial agents by broth dilution. *Clinical  
692 Microbiology and Infection* 9(8), ix-xv. doi: 10.1046/j.1469-0691.2003.00790.x.
- 693 Minnock, A., Vernon, D.I., Schofield, J., Griffiths, J., Parish, J.H., and Brown, S.B. (2000).  
694 Mechanism of Uptake of a Cationic Water-Soluble Pyridinium Zinc Phthalocyanine across  
695 the Outer Membrane of *Escherichia coli*. *Antimicrobial Agents and Chemotherapy*  
696 44(3), 522-527. doi: 10.1128/aac.44.3.522-527.2000.
- 697 Moreno, I., Avendaño-Alejo, M., and Tzonchev, R.I. (2006). Designing light-emitting diode arrays  
698 for uniform near-field irradiance. *Applied Optics* 45(10), 2265-2272. doi:  
699 10.1364/AO.45.002265.
- 700 Morici, P., Battisti, A., Tortora, G., Menciassi, A., Checcucci, G., Ghetti, F., et al. (2020). The in  
701 vitro Photoinactivation of Helicobacter pylori by a Novel LED-Based Device. *Frontiers in  
702 Microbiology* 11(283). doi: 10.3389/fmicb.2020.00283.
- 703 Moser, M. (1972). Die Gattung Dermocybe (Fr.) Wünsche (Die Hautköpfe). *Schw. Zeitschrift für  
704 Pilzkunde*. 83,11. Sondernummer 83,, 153-167.
- 705 Mugas, M.L., Calvo, G., Marioni, J., Céspedes, M., Martinez, F., Sáenz, D., et al. (2021).  
706 Photodynamic therapy of tumour cells mediated by the natural anthraquinone parietin and  
707 blue light. *Journal of Photochemistry and Photobiology B: Biology* 214, 112089. doi:  
708 <https://doi.org/10.1016/j.jphotobiol.2020.112089>.

## A new High-Throughput-Screening-assay for Photoantimicrobials

- 709 Nielsen, H.K., Garcia, J., Væth, M., and Schlafer, S. (2015). Comparison of Riboflavin and Toluidine  
710 Blue O as Photosensitizers for Photoactivated Disinfection on Endodontic and Periodontal  
711 Pathogens In Vitro. *PLOS ONE* 10(10), e0140720. doi: 10.1371/journal.pone.0140720.
- 712 Ogonowska, P., Woźniak, A., Pierański, M., Wasylew, T., Kwiek, P., Brasel, M., et al. (2019).  
713 Application and characterization of light-emitting diodes for photodynamic inactivation of  
714 bacteria. *Lighting Research & Technology* 51(4), 612-624. doi: 10.1177/1477153518781478.
- 715 Pieslinger, A., Plaetzer, K., Oberdanner, C.B., Berlanda, J., Mair, H., Krammer, B., et al. (2006).  
716 Characterization of a simple and homogeneous irradiation device based on light-emitting  
717 diodes: A possible low-cost supplement to conventional light sources for photodynamic  
718 treatment. *Medical Laser Application* 21(4), 277-283. doi: 10.1016/j.mla.2006.07.004.
- 719 Quintanar, L.F.H., Silva, F.Y.L., Bustos, D.A.F., Navarro, J.S., Vázquez, J.M.d.L.R., Brodin, P.N., et  
720 al. (2016). In Vitro Photoirradiation System for Simultaneous Irradiation with Different Light  
721 Doses at a Fixed Temperature. *Photomedicine and Laser Surgery* 34(3), 108-115. doi:  
722 10.1089/pho.2015.4030.
- 723 Reifegerste, F., and Lienig, J. (2008). Modelling of the Temperature and Current Dependence of  
724 LED Spectra. *Journal of Light & Visual Environment* 32(3), 288-294. doi:  
725 10.2150/jlve.32.288.
- 726 Schmidt, R., Tanielian, C., Dunsbach, R., and Wolff, C. (1994). Phenalenone, a universal reference  
727 compound for the determination of quantum yields of singlet oxygen O<sub>2</sub>(<sup>1</sup>Δg) sensitization.  
728 *Journal of Photochemistry and Photobiology A: Chemistry* 79(1), 11-17. doi:  
729 [https://doi.org/10.1016/1010-6030\(93\)03746-4](https://doi.org/10.1016/1010-6030(93)03746-4).
- 730 Schubert, E.F. (2006). *Light-Emitting Diodes (Second Edition, 2006)*. E. Fred Schubert.
- 731 Siewert, B. (2021). Does the chemistry of fungal pigments demand the existence of photoactivated  
732 defense strategies in basidiomycetes? *Photochemical & Photobiological Sciences*. doi:  
733 10.1007/s43630-021-00034-w.
- 734 Siewert, B., and Stuppner, H. (2019). The photoactivity of natural products - An overlooked potential  
735 of phytomedicines? *Phytomedicine* 60, 152985. doi: 10.1016/j.phymed.2019.152985.
- 736 Siewert, B., Vrabl, P., Hammerle, F., Bingger, I., and Stuppner, H. (2019). A convenient workflow to  
737 spot photosensitizers revealed photo-activity in basidiomycetes. *RSC Advances* 9(8), 4545-  
738 4552. doi: 10.1039/C8RA10181G.
- 739 Supronowicz, R., and Fryc, I. (Year). "The LED spectral power distribution modelled by different  
740 functions - how spectral matching quality affected computed LED color parameters", in: *2019*  
741 *Second Balkan Junior Conference on Lighting (Balkan Light Junior)*), 1-4.
- 742 Tingstad, L., Gjerde, I., Dahlberg, A., and Grytnes, J.A. (2017). The influence of spatial scales on  
743 Red List composition: Forest species in Fennoscandia. *Global Ecology and Conservation* 11,  
744 247-297. doi: <https://doi.org/10.1016/j.gecco.2017.07.005>.
- 745 Wainwright, M. (2009). Photoantimicrobials—So what's stopping us? *Photodiagnosis and*  
746 *Photodynamic Therapy* 6(3), 167-169. doi: <https://doi.org/10.1016/j.pdpdt.2009.10.007>.
- 747 Weinstein, M.P., and Lewis, J.S., 2nd (2020). The Clinical and Laboratory Standards Institute  
748 Subcommittee on Antimicrobial Susceptibility Testing: Background, Organization, Functions,  
749 and Processes. *J Clin Microbiol* 58(3). doi: 10.1128/jcm.01864-19.

## A new High-Throughput-Screening-assay for Photoantimicrobials

- 750 Wiegand, C., Abel, M., Ruth, P., Elsner, P., and Hipler, U.C. (2015). pH Influence on Antibacterial  
751 Efficacy of Common Antiseptic Substances. *Skin Pharmacology and Physiology* 28(3), 147-  
752 158. doi: 10.1159/000367632.
- 753 Wiegand, I., Hilpert, K., and Hancock, R.E.W. (2008). Agar and broth dilution methods to determine  
754 the minimal inhibitory concentration (MIC) of antimicrobial substances. *Nature Protocols* 3,  
755 163. doi: 10.1038/nprot.2007.521.
- 756 Wood, D. (1994). *Optoelectronic Semiconductor Devices*. Prentice Hall.
- 757 Wozniak, A., and Grinholc, M. (2018). Combined Antimicrobial Activity of Photodynamic  
758 Inactivation and Antimicrobials–State of the Art. *Frontiers in Microbiology* 9(930). doi:  
759 10.3389/fmicb.2018.00930.
- 760 Zhang, A.L., Qin, J.C., Bai, M.-S., Gao, J.M., Zhang, Y.M., Yang, S.X., et al. (2009). Rufoolivacin  
761 B, a novel polyketide pigment from the fruiting bodies of the fungus *Cortinarius rufo-*  
762 *olivaceus* (basidiomycetes). *Chinese Chemical Letters* 20(11), 1324-1326. doi:  
763 <https://doi.org/10.1016/j.cclet.2009.05.021>.
- 764
- 765
